# Supplementary material
Source: publisher site journal article supplement (https://www.spandidos-publications.com/85/downloadSupplementary)

Figure S1. Protein expression of HSP70 was detected by western blot analysis in fibroblasts transfected with NC siRNA or HSP70-targeting siRNA. Results are presented as mean  $\pm$  standard deviation. \* $P < 0.05$ . HSP70, heat shock protein 70; NC, negative control; siRNA, small interfering RNA.

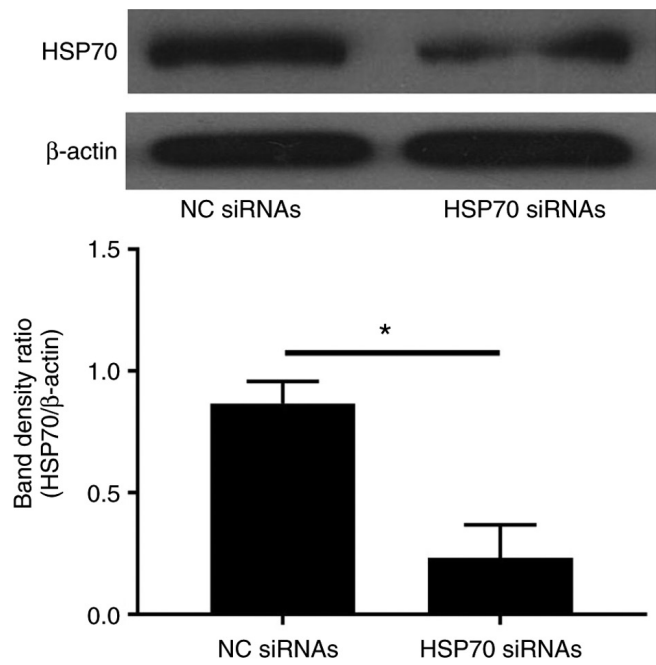

Supplement: Supplementary file 1 [file downloadSupplementary]
